# Supplementary material for: Flexible composite phase change materials with enhanced thermal conductivity and mechanical performance for thermal management
Source: Royal Society of Chemistry journal article supplement (doi:10.1039/d3ta03971d), 2023-01-01
Supplement: d3ta03971d1.pdf [file d3ta03971d1.pdf]

## Supporting information

### **Flexible composite phase change materials with enhanced thermal conductivity and mechanical performance for thermal management**

*Shuang-Zhu Li<sup>a</sup>, Yi-Cun Zhou<sup>a</sup>, Lu-Ning Wang<sup>a</sup>, Shuai-Peng Wang<sup>a</sup>, Lu Bai<sup>a</sup>, Chang-Ping Feng<sup>b</sup>,  
Rui-Ying Bao<sup>a</sup>, Jie Yang<sup>a,\*</sup>, Ming-Bo Yang<sup>a</sup>, Wei Yang<sup>a,\*</sup>*

<sup>a</sup>College of Polymer Science and Engineering, Sichuan University, State Key Laboratory of Polymer Materials Engineering, Chengdu, Sichuan, 610065 P. R. China

<sup>b</sup>Shandong Engineering Research Center for Additive Manufacturing, Qingdao University of Technology, Qingdao, Shandong, 266520 P. R. China

---

\* Corresponding authors.

Tel.: + 86 28 8546 0130; fax: + 86 28 8546 0130.

*Email addresses:* psejeyang@scu.edu.cn (J. Yang); weiyang@scu.edu.cn (W. Yang)

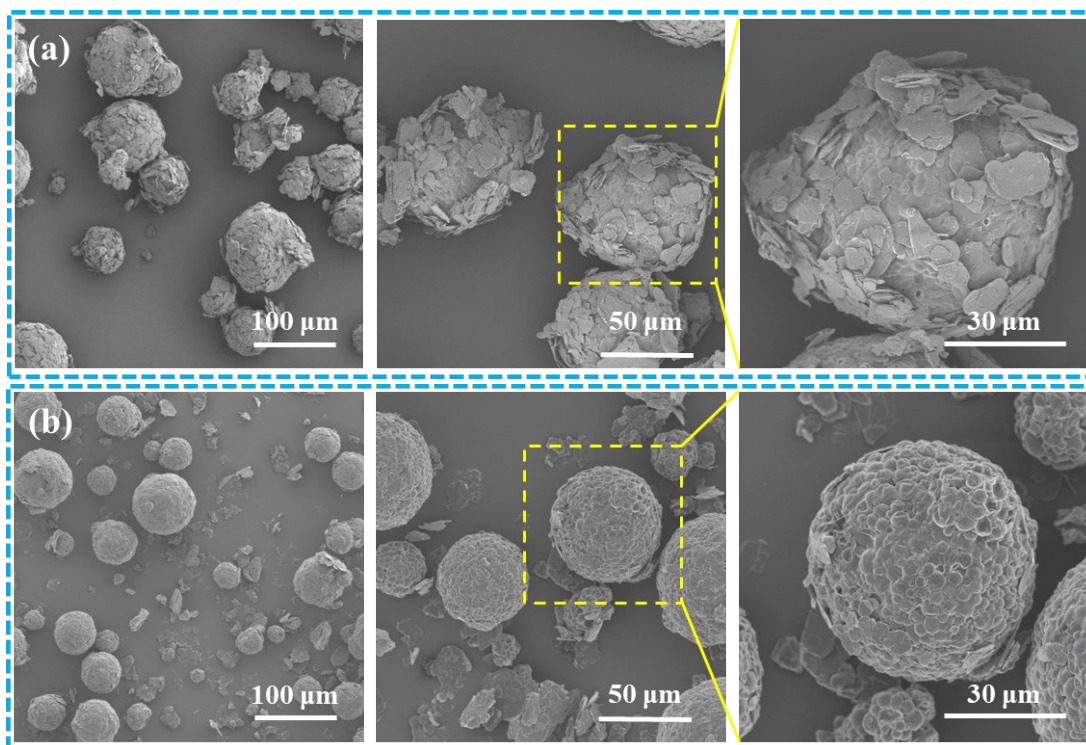

**Fig. S1** SEM images of B40@M (a) with and (b) without adhesive polymers.

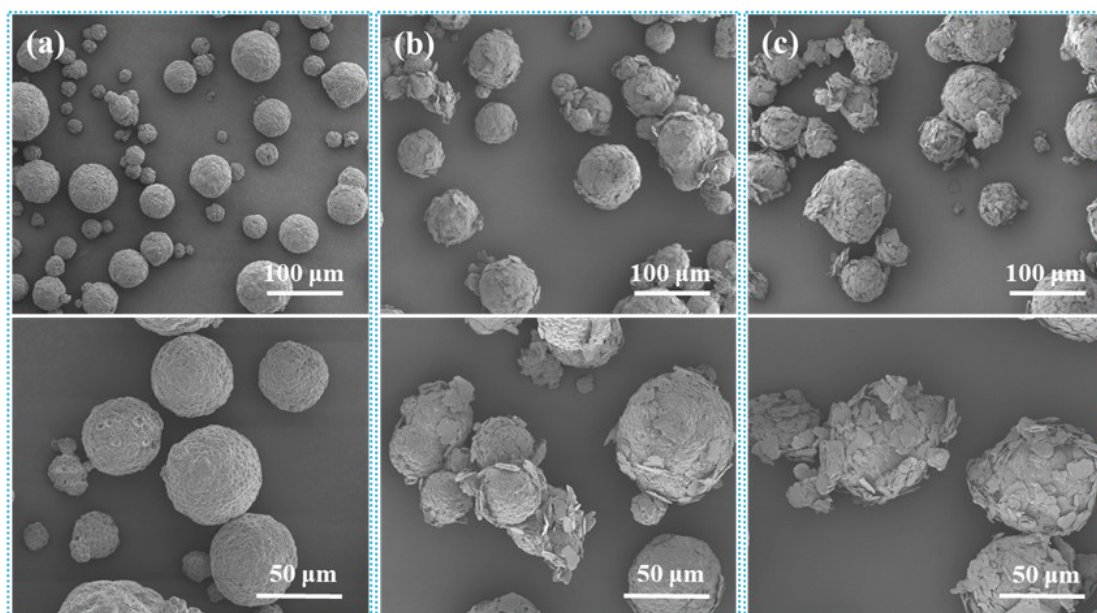

**Fig. S2** SEM images of large amounts of (a) MCPW, (b) B20@M, and (c) B40@M.

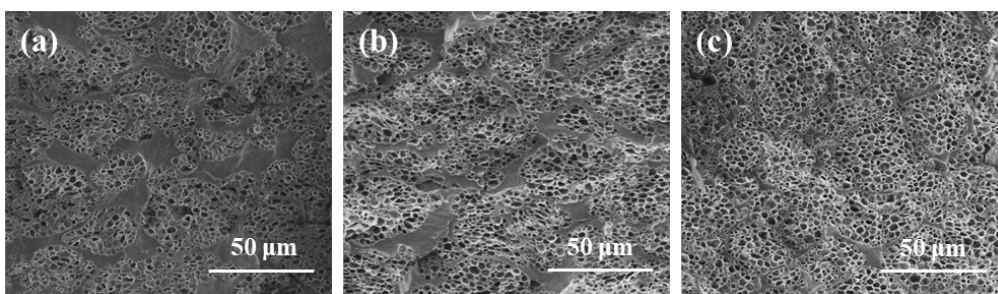

**Fig. S3** Cross-sectional SEM images of (a) NM60, (b) NM70, and (c) NM80.

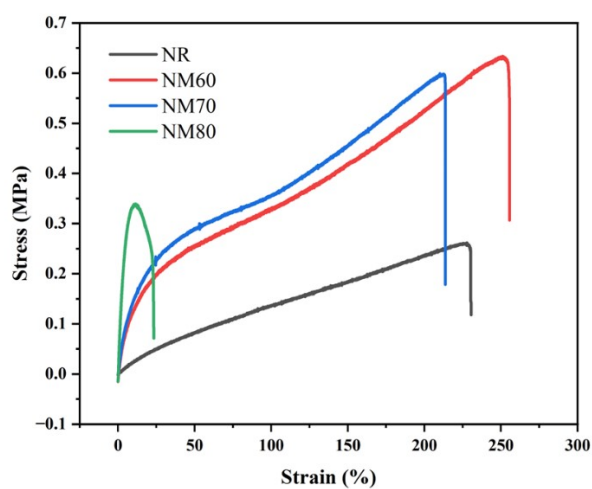

**Fig. S4** Typical stress-strain curves of NR, NM60, NM70, and NM80.

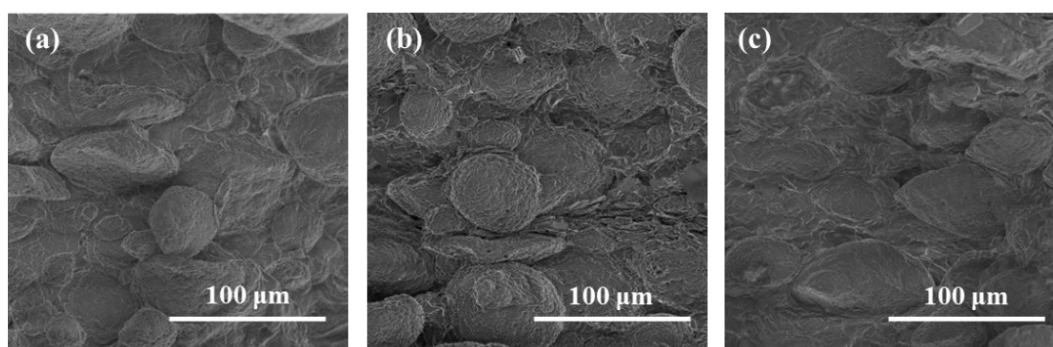

**Fig. S5** Tensile fracture-surface SEM images of (a) NM70, (B)NB20/M, and (c) NB20@M.

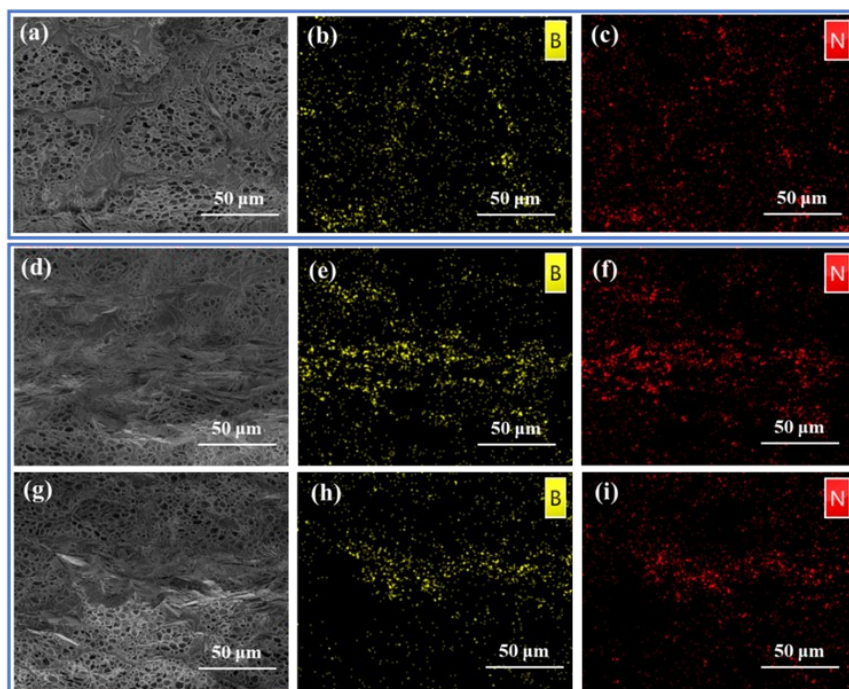

**Fig. S6** Cross-sectional SEM images and corresponding mapping images of (a-c) NB20@M and (d-i) NB20/M.

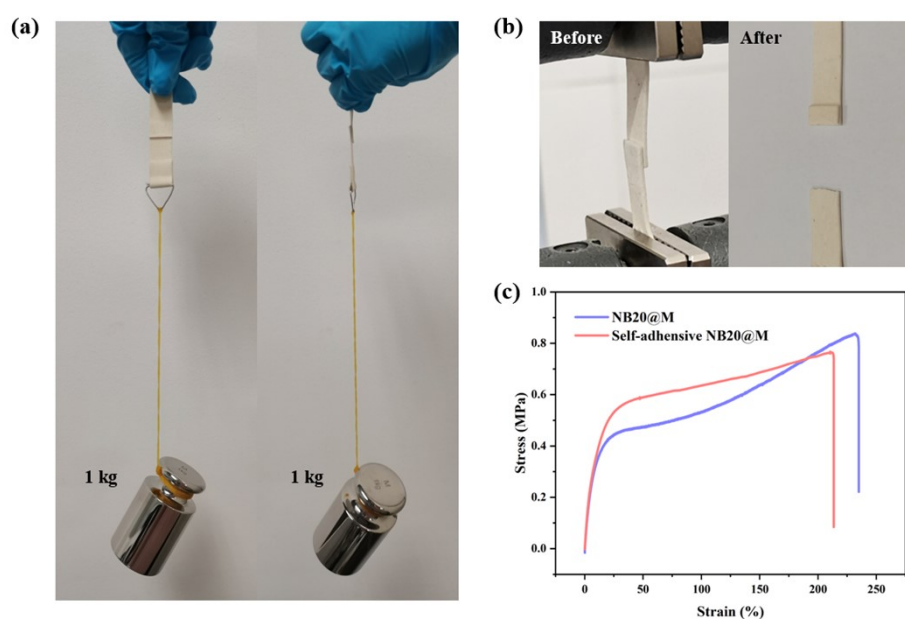

**Fig. S7** Self-adhesive properties of flexible PCMs. (a) Strong self-adhesive demonstration of NB20@M: Two splines were bonded together by self-adhesion with an adhesion area of  $15 \times 10$  mm<sup>2</sup>. (b) Digital photos of a self-adhesive spline before and after the tensile fracture. (c) Stress-strain curves of original and self-adhesive NB20@M samples.



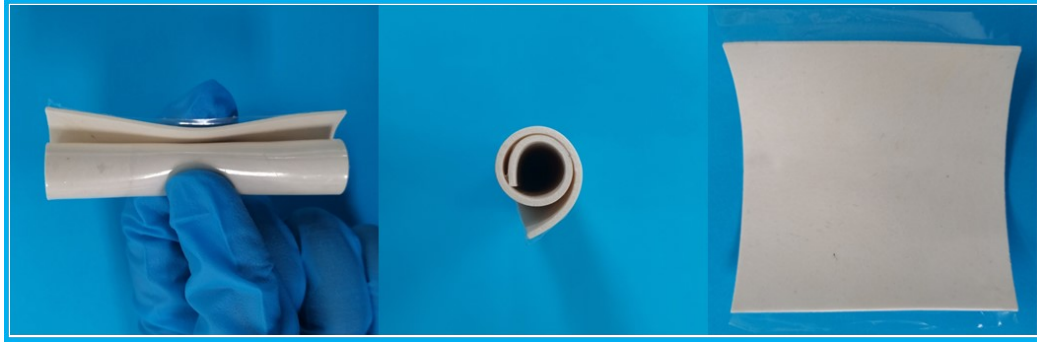

**Fig. S8** Digital photos of NB20@M using as the phase change tape.

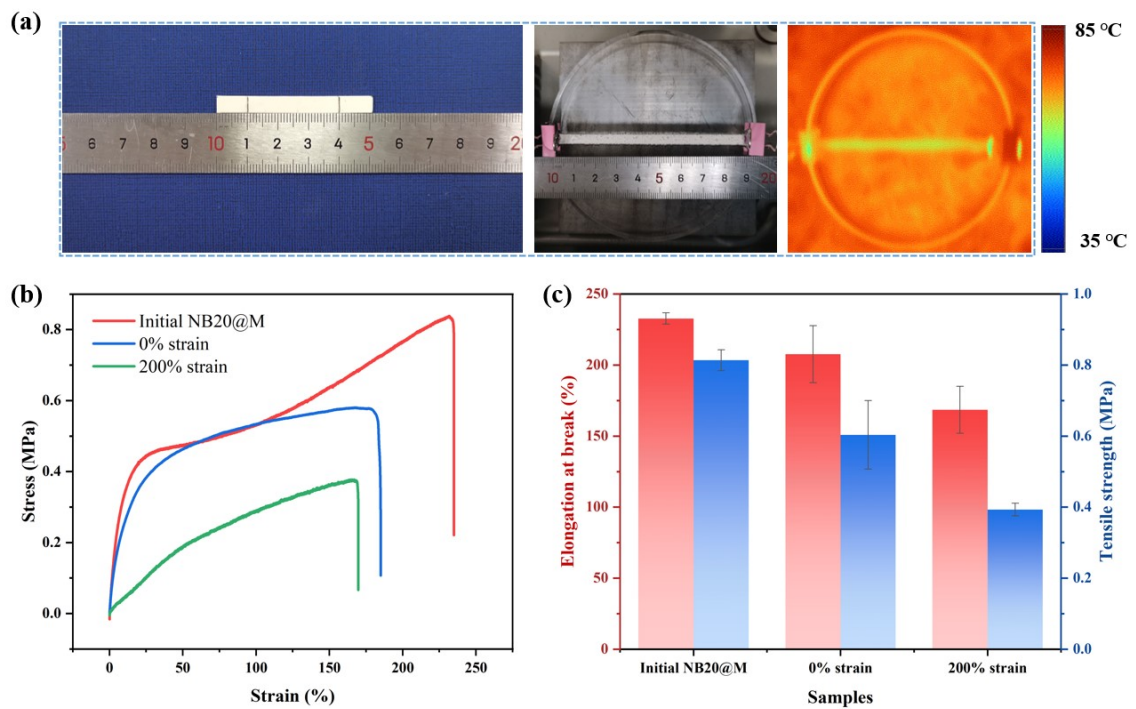

**Fig. S9** (a) Digital and infrared images showing the underwater stretchability of NB20@M at 80 °C. (b) Typical stress-strain curves and (c) statistical elongational at break and tensile strength of NB20@M after the immersion and stretching in 80 °C for 24 h.

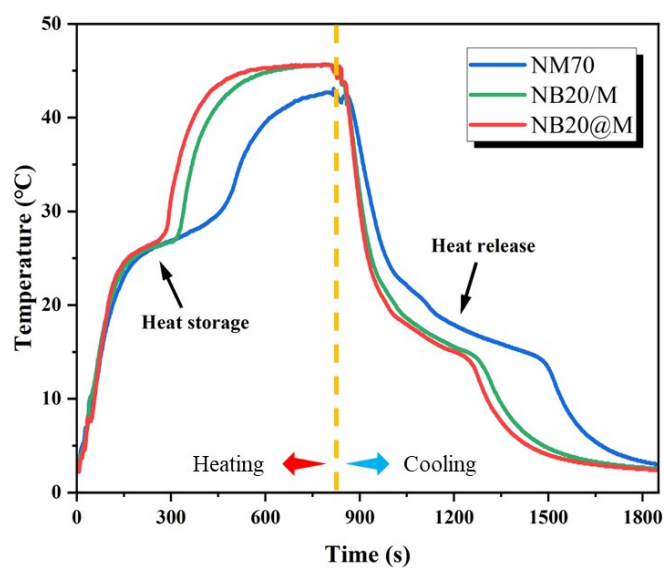

**Fig. S10** Temperature evolution curves of NM70, NB20/M, and NB20@M during heating on a 50 °C hot stage and cooling on a 0 °C iron block.

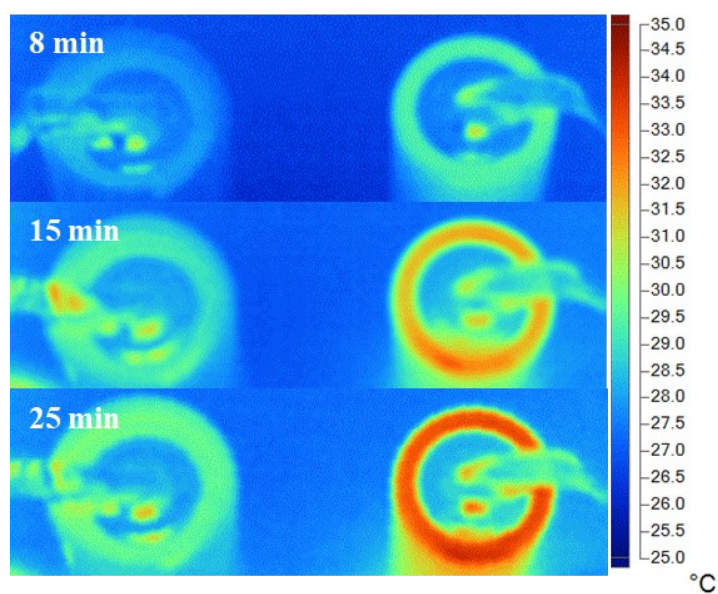

**Fig. S11** Infrared images of the battery with/without NB20@M during the discharging.

**Table S1** Comparison of key properties between NB20@M in this work and previously reported flexible organic PCMs.

| Samples                                    | Thermal conductivity<br>(W m <sup>-1</sup> K <sup>-1</sup> ) | Elongation at break<br>(%) | References          |
|--------------------------------------------|--------------------------------------------------------------|----------------------------|---------------------|
| OBC/PW/EG                                  | 4.2                                                          | 5.4                        | 2020 <sup>S1</sup>  |
| PU/CNT                                     | 0.5                                                          | 6                          | 2020 <sup>S2</sup>  |
| POE-SEBS/PW/BN                             | 0.32                                                         | 44                         | 2021 <sup>S3</sup>  |
| POE/PW/GNP                                 | 0.73                                                         | 18.75                      | 2021 <sup>S4</sup>  |
| TPE/PW/EG                                  | 2.2                                                          | 20                         | 2021 <sup>S5</sup>  |
| EVA/EG/PA                                  | 1.7                                                          | 3.68                       | 2021 <sup>S6</sup>  |
| SBS/PW/CNT                                 | 0.39                                                         | 20.33                      | 2022 <sup>S7</sup>  |
| SEPS/n-<br>Docosane/MWCNT/BN               | 0.43                                                         | 101                        | 2022 <sup>S8</sup>  |
| SEBS/PA/BN/Ag@HGMs                         | 1.54                                                         | 160                        | 2022 <sup>S9</sup>  |
| BN@Fe <sub>3</sub> O <sub>4</sub> /PEG/PAA | 1.07                                                         | 10.4                       | 2022 <sup>S10</sup> |
| PEG/PVA/CNTs                               | 0.065                                                        | 262                        | 2022 <sup>S11</sup> |
| NB20@M                                     | 0.585                                                        | 233                        | This work           |

**Table S2** DSC heating and cooling characteristics of MCPW and composite PCMs.

| Samples* | $T_c$ (°C) | $\Delta H_c$ (J g <sup>-1</sup> ) | $T_m$ (°C) | $\Delta H_m$ (J g <sup>-1</sup> ) |
|----------|------------|-----------------------------------|------------|-----------------------------------|
| MCPW     | 11.9       | 192.2                             | 30.1       | 193.4                             |
| NM70     | 8.2        | 128.4                             | 33.4       | 129.5                             |
| NB20/M   | 9.3        | 82.6                              | 32.2       | 85.3                              |
| NB20@M   | 8.9        | 83.7                              | 32.4       | 86.5                              |

\* $T_c$ ,  $\Delta H_c$ ,  $T_m$ , and  $\Delta H_m$  represent crystallization temperature, crystallization enthalpy, melting temperature, and melting enthalpy, respectively.

## References

- S1. S. Wu, T. Li, M. Wu, J. Xu, Y. Hu, J. Chao, T. Yan and R. Wang, *J. Mater. Chem. A*, 2020, **8**, 20011-20020.
- S2. J. Shi, W. Aftab, Z. Liang, K. Yuan, M. Maqbool, H. Jiang, F. Xiong, M. Qin, S. Gao and R. Zou, *J. Mater. Chem. A*, 2020, **8**, 20133-20140.
- S3. L.-Y. Yang, C.-P. Feng, L. Bai, R.-Y. Bao, Z.-Y. Liu, M.-B. Yang and W. Yang, *Chem. Eng. J.*, 2021, **425**, 131466.
- S4. F. Wei, C.-P. Feng, J. Yang, L.-Y. Yang, L. Bai, R.-Y. Bao, Z.-Y. Liu, M.-B. Yang and W. Yang, *ACS Appl. Mater. Interfaces*, 2021, **13**, 59364-59372.
- S5. Z. Cai, J. Liu, Y. Zhou, L. Dai, H. Wang, C. Liao, X. Zou, Y. Chen and Y. Xu, *Sol. Energy Mater. Sol. Cells*, 2021, **219**, 110728.
- S6. S. Li, X. Dong, X. Lin, D. Shao, G. Zhang, J. Deng and X. Yang, *J. Energy Storage*, 2021, **44**, 103447.
- S7. D. Hu, L. Han, W. Zhou, P. Li, Y. Huang, Z. Yang and X. Jia, *Chem. Eng. J.*, 2022, **437**, 135056.
- S8. Y. Ma, H. Wang, L. Zhang, X. Sheng and Y. Chen, *Compos. Part A Appl. Sci. Manuf.*, 2022, **163**, 107203.
- S9. H. Zhang, S. Zhang, C. Li, Z. Shi, Q. Yang, S. Wang and C. Xiong, *J. Energy Storage*, 2022, **52**, 104836.
- S10. H. Cao, Y. Li, W. Xu, J. Yang, Z. Liu, L. Bai, W. Yang and M. Yang, *ACS Appl. Mater. Interfaces*, 2022, **14**, 52411-52421.
- S11. J. Wu, M. Wang, L. Dong, C. Zhu, J. Shi and H. Morikawa, *ACS Sustainable Chem. Eng.*, 2022, **10**, 7873-7882.
